# Supplementary material for: Europium(III) Complex-Functionalized SiO2@mTiO2 Nanospheres for Al3+-Modulated Multicolor Emission
Source: MDPI journal article supplement (doi:10.3390/nano11112886), 2021-10-28
Supplement: s1 [file s1]

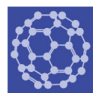

Supplementary Materials

# Europium(III) Complex-Functionalized SiO<sub>2</sub>@mTiO<sub>2</sub> Nanospheres for Al<sup>3+</sup>-Modulated Multicolor Emission

Chao Bai <sup>1,2</sup>, Shi He <sup>2</sup>, Huai-Ming Hu <sup>2,\*</sup>, Hui Zeng <sup>2</sup>, Feng Zou <sup>2</sup> and Ji-Jiang Wang <sup>1,\*</sup>

<sup>1</sup> Key Laboratory of New Energy & New Functional Materials, Shaanxi Key Laboratory of Chemical Reaction Engineering, College of Chemistry and Chemical Engineering, Yan'an University, Yan'an 716000, China; baichao\_chem@163.com

<sup>2</sup> Key Laboratory of Synthetic and Natural Functional Molecule of the Ministry of Education, College of Chemistry and Materials Science, Northwest University, Xi'an 710127, China; hans5113@163.com (S.H.); 17863522138@163.com (H.Z.); 201931739@stumail.nwu.edu. (F.Z.)

\* Correspondence: Chemhu1@nwu.edu.cn (H.-M.H.); yadxwj@126.com (J.-J.W.)

## Table of Contents

1. **Figure S1.** FT-IR spectra of  $\text{SiO}_2@\text{mTiO}_2$  (a),  $\text{SiO}_2@\text{mTiO}_2\text{-bpdc}$  (b),  $\text{Eu}(\text{tta})_3\text{bpdc-SiO}_2@\text{mTiO}_2$  (c) and  $\text{H}_2\text{bpdc}$  ligand (d).
2. **Figure S2.** TEM image of  $\text{SiO}_2@\text{mTiO}_2$ .
3. **Figure S3.** EDS mapping for each element in  $\text{SiO}_2@\text{mTiO}_2$ .
4. **Figure S4.** Luminescent lifetime of hybrid material  $\text{Eu}(\text{tta})_3\text{bpdc-SiO}_2@\text{mTiO}_2$  in state solid.
5. **Figure S5.** Excitation and emission spectra of hybrid material  $\text{Eu}(\text{tta})_3\text{bpdc-SiO}_2@\text{mTiO}_2$  in ethanol solution at room temperature.
6. **Figure S6.** Luminescent intensities of hybrid material  $\text{Eu}(\text{tta})_3\text{bpdc-SiO}_2@\text{mTiO}_2$  at 396 nm in presence of other metal ions and  $\text{Al}^{3+}$  ion in ethanol solution.
7. **Figure S7.** C 1s spectra for hybrid materials  $\text{Eu}(\text{tta})_3\text{bpdc-SiO}_2@\text{mTiO}_2$  and  $\text{Eu}(\text{tta})_3\text{bpdc-SiO}_2@\text{mTiO}_2 + \text{Al}^{3+}$ .
8. **Figure S8.** The PXRD patterns of hybrid materials  $\text{Eu}(\text{tta})_3\text{bpdc-SiO}_2@\text{mTiO}_2$  and  $\text{Eu}(\text{tta})_3\text{bpdc-SiO}_2@\text{mTiO}_2 + \text{Al}^{3+}$ .
9. **Figure S9.** TEM image of  $\text{Eu}(\text{tta})_3\text{bpdc-SiO}_2@\text{mTiO}_2 + \text{Al}^{3+}$ .
10. **Figure S10.** EDS mapping for each element in  $\text{Eu}(\text{tta})_3\text{bpdc-SiO}_2@\text{mTiO}_2 + \text{Al}^{3+}$ .
11. **Table S1.** The FT-IR characteristic bands of  $\text{SiO}_2@\text{mTiO}_2$ ,  $\text{SiO}_2@\text{mTiO}_2\text{-bpdc}$ ,  $\text{Eu}(\text{tta})_3\text{bpdc-SiO}_2@\text{mTiO}_2$  and  $\text{H}_2\text{bpdc}$  ligand.
12. **Table S2.** The characteristic diffraction peaks for PXRD in  $\text{SiO}_2@\text{mTiO}_2$ ,  $\text{SiO}_2@\text{mTiO}_2\text{-bpdc}$ ,  $\text{Eu}(\text{tta})_3\text{bpdc-SiO}_2@\text{mTiO}_2$  and  $\text{Eu}(\text{tta})_3\text{bpdc-SiO}_2@\text{mTiO}_2 + \text{Al}^{3+}$ .
13. **Table S3.** CIE coordinates and emission colors of hybrid material  $\text{Eu}(\text{tta})_3\text{bpdc-SiO}_2@\text{mTiO}_2$  in different concentrations of  $\text{Al}^{3+}$  ion.
14. **Table S4.** Binding energies for XPS in hybrid materials  $\text{Eu}(\text{tta})_3\text{bpdc-SiO}_2@\text{mTiO}_2$  and  $\text{Eu}(\text{tta})_3\text{bpdc-SiO}_2@\text{mTiO}_2 + \text{Al}^{3+}$ .
15. **Table S5.** The mass ratio of each element in  $\text{Eu}(\text{tta})_3\text{bpdc-SiO}_2@\text{mTiO}_2$  and  $\text{Eu}(\text{tta})_3\text{bpdc-SiO}_2@\text{mTiO}_2 + \text{Al}^{3+}$ .

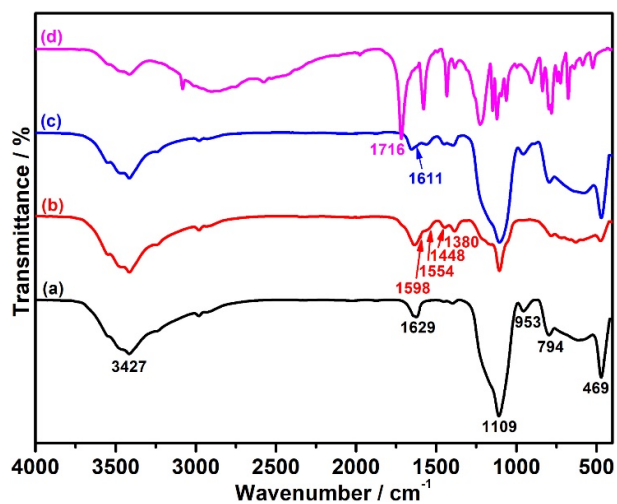

**Figure S1.** FT-IR spectra of  $\text{SiO}_2@m\text{TiO}_2$  (a),  $\text{SiO}_2@m\text{TiO}_2$ -bpdc (b),  $\text{Eu}(\text{tta})_3\text{bpdc-SiO}_2@m\text{TiO}_2$  (c) and  $\text{H}_2\text{bpdc}$  ligand (d).

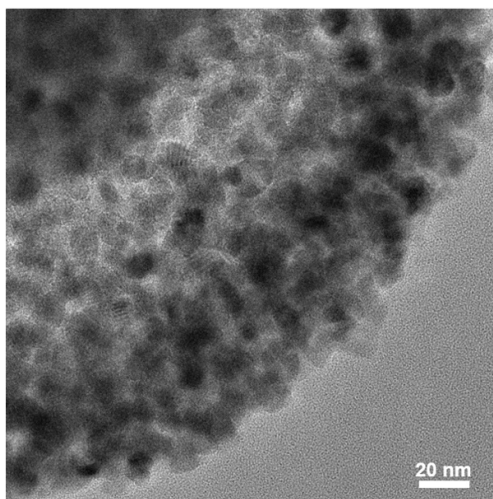

**Figure S2.** TEM image of  $\text{SiO}_2@m\text{TiO}_2$ .

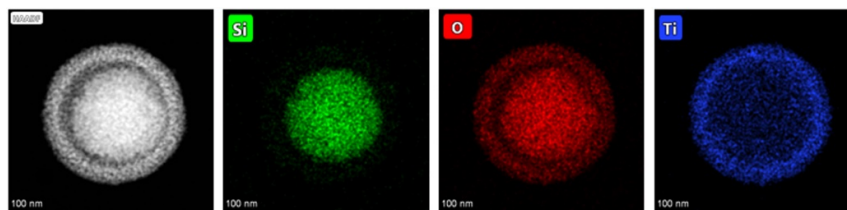

**Figure S3.** EDS mapping for each element in  $\text{SiO}_2@m\text{TiO}_2$ .

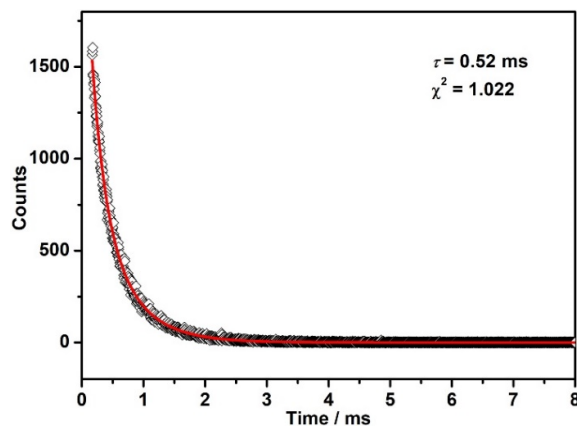

**Figure S4.** Luminescent lifetime of hybrid material  $\text{Eu}(\text{tta})_3\text{bpdC-SiO}_2@\text{mTiO}_2$  in state solid.

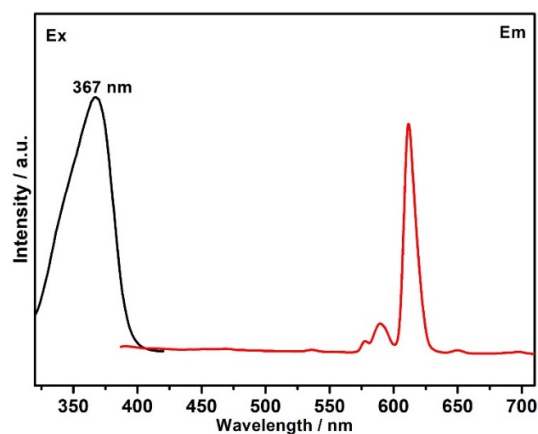

**Figure S5.** Excitation and emission spectra of hybrid material  $\text{Eu}(\text{tta})_3\text{bpdC-SiO}_2@\text{mTiO}_2$  in ethanol solution at room temperature.

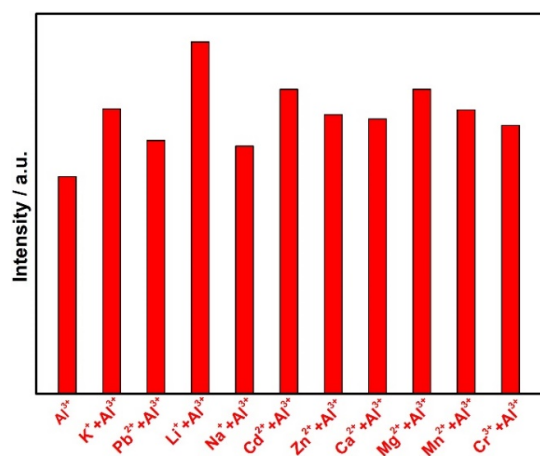

**Figure S6.** Luminescent intensities of hybrid material  $\text{Eu}(\text{tta})_3\text{bpdC-SiO}_2@\text{mTiO}_2$  at 396 nm in presence of other metal ions and  $\text{Al}^{3+}$  ion in ethanol solution.

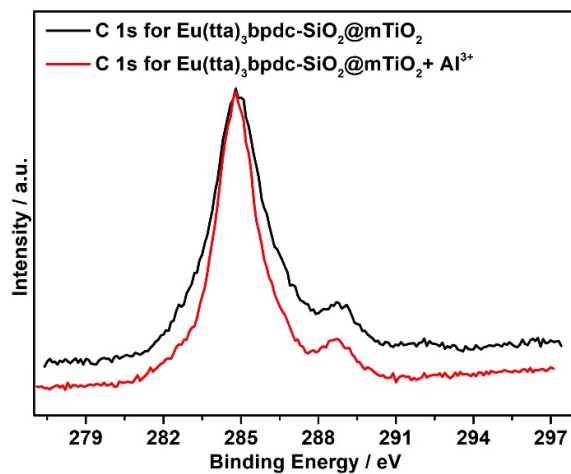

**Figure S7.** C 1s spectra for hybrid materials Eu(tta)<sub>3</sub>bpdc-SiO<sub>2</sub>@mTiO<sub>2</sub> and Eu(tta)<sub>3</sub>bpdc-SiO<sub>2</sub>@mTiO<sub>2</sub> + Al<sup>3+</sup>.

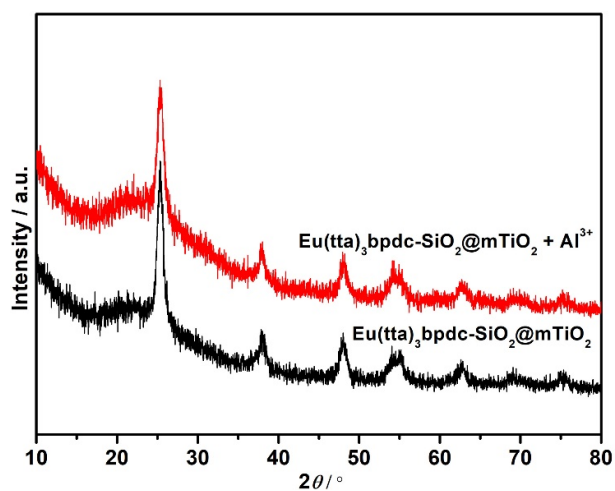

**Figure S8.** The PXRD patterns of hybrid materials Eu(tta)<sub>3</sub>bpdc-SiO<sub>2</sub>@mTiO<sub>2</sub> and Eu(tta)<sub>3</sub>bpdc-SiO<sub>2</sub>@mTiO<sub>2</sub> + Al<sup>3+</sup>.

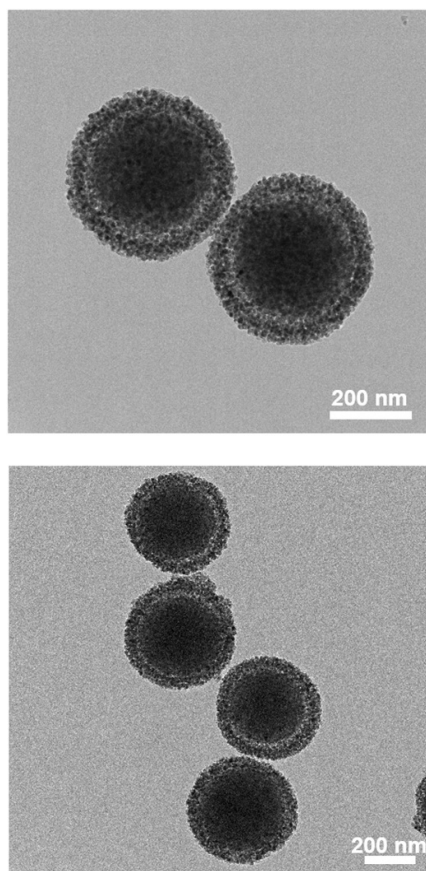

**Figure S9.** TEM image of  $\text{Eu}(\text{tta})_3\text{bpdc-SiO}_2@\text{mTiO}_2 + \text{Al}^{3+}$ .

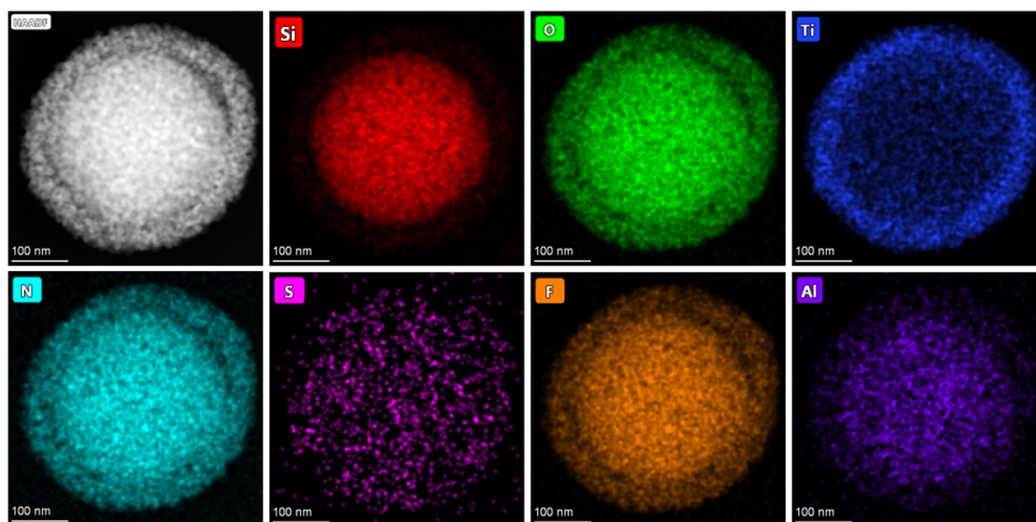

**Figure S10.** EDS mapping for each element in  $\text{Eu}(\text{tta})_3\text{bpdc-SiO}_2@\text{mTiO}_2 + \text{Al}^{3+}$ .

**Table S1.** The FT-IR characteristic bands of SiO<sub>2</sub>@mTiO<sub>2</sub>, SiO<sub>2</sub>@mTiO<sub>2</sub>-bpdc, Eu(tta)<sub>3</sub>bpdc-SiO<sub>2</sub>@mTiO<sub>2</sub> and H<sub>2</sub>bpdc ligand.

| Characteristic Bands                                                           | Wavenumber / cm <sup>-1</sup> | Ref.    |
|--------------------------------------------------------------------------------|-------------------------------|---------|
| Ti–O                                                                           | 450~750                       | [1]     |
| Si–O asymmetric stretching vibration                                           | 1109                          | [2,3]   |
| Si–O symmetric stretching vibration                                            | 794                           | [2,3]   |
| Si–OH stretching vibration                                                     | 953                           | [2,3]   |
| carboxylic groups of H <sub>2</sub> bpdc                                       | 1716                          | [1]     |
| $\nu_{\text{asym}}(\text{COO}^-)$ of SiO <sub>2</sub> @mTiO <sub>2</sub> -bpdc | 1554                          | [1,4–8] |
| $\nu_{\text{sym}}(\text{COO}^-)$ of SiO <sub>2</sub> @mTiO <sub>2</sub> -bpdc  | 1380                          | [1,4–8] |
| C=N of SiO <sub>2</sub> @mTiO <sub>2</sub> -bpdc                               | 1598                          | [1]     |
| C=N of Eu(tta) <sub>3</sub> bpdc-SiO <sub>2</sub> @mTiO <sub>2</sub>           | 1611                          | [1]     |

**Table S2.** The characteristic diffraction peaks for PXRD in SiO<sub>2</sub>@mTiO<sub>2</sub>, SiO<sub>2</sub>@mTiO<sub>2</sub>-bpdc, Eu(tta)<sub>3</sub>bpdc-SiO<sub>2</sub>@mTiO<sub>2</sub> and Eu(tta)<sub>3</sub>bpdc-SiO<sub>2</sub>@mTiO<sub>2</sub> + Al<sup>3+</sup>.

|       | SiO <sub>2</sub> @mTiO <sub>2</sub> | SiO <sub>2</sub> @mTiO <sub>2</sub> -bpdc | Eu(tta) <sub>3</sub> bpdc-SiO <sub>2</sub> @mTiO <sub>2</sub> | Eu(tta) <sub>3</sub> bpdc-SiO <sub>2</sub> @mTiO <sub>2</sub> + Al <sup>3+</sup> |
|-------|-------------------------------------|-------------------------------------------|---------------------------------------------------------------|----------------------------------------------------------------------------------|
| (101) | 25.27°                              | 25.30°                                    | 25.33°                                                        | 25.31°                                                                           |
| (004) | 37.84°                              | 37.84°                                    | 37.84°                                                        | 37.81°                                                                           |
| (200) | 48.03°                              | 48.01°                                    | 48.01°                                                        | 48.10°                                                                           |
| (105) | 54.23°                              | 54.29°                                    | 54.30°                                                        | 54.31°                                                                           |
| (211) | 55.04°                              | 55.03°                                    | 55.03°                                                        | 55.05°                                                                           |
| (204) | 62.64°                              | 62.63°                                    | 62.62°                                                        | 62.61°                                                                           |
| (116) | 69.32°                              | 69.33°                                    | 62.34°                                                        | 62.34°                                                                           |
| (220) | 71.29°                              | 71.29°                                    | 71.29°                                                        | 71.29°                                                                           |
| (215) | 75.63°                              | 75.66°                                    | 75.66°                                                        | 75.66°                                                                           |

**Table S3.** CIE coordinates and emission colors of hybrid material  $\text{Eu}(\text{tta})_3\text{bpdc-SiO}_2@\text{mTiO}_2$  in different concentrations of  $\text{Al}^{3+}$  ion.

| Concentration of $\text{Al}^{3+}$ ion ( $\mu\text{M}$ ) | CIE (x, y)     | Color         |
|---------------------------------------------------------|----------------|---------------|
| 0                                                       | (0.565, 0.325) | Red           |
| 16                                                      | (0.454, 0.279) | Pink          |
| 33                                                      | (0.356, 0.231) | Pink          |
| 49                                                      | (0.303, 0.199) | Pink          |
| 66                                                      | (0.269, 0.177) | Pink          |
| 82                                                      | (0.245, 0.162) | Purplish pink |
| 99                                                      | (0.227, 0.148) | Purplish pink |
| 115                                                     | (0.210, 0.133) | Purplish pink |
| 147                                                     | (0.193, 0.116) | Purplish blue |
| 180                                                     | (0.183, 0.105) | Purplish blue |
| 212                                                     | (0.177, 0.097) | Purplish blue |
| 243                                                     | (0.175, 0.094) | Blue          |

**Table S4.** Binding energies for XPS in hybrid materials  $\text{Eu}(\text{tta})_3\text{bpdc-SiO}_2@\text{mTiO}_2$  and  $\text{Eu}(\text{tta})_3\text{bpdc-SiO}_2@\text{mTiO}_2 + \text{Al}^{3+}$ .

| Peak  | $\text{Eu}(\text{tta})_3\text{bpdc-SiO}_2@\text{mTiO}_2$ | $\text{Eu}(\text{tta})_3\text{bpdc-SiO}_2@\text{mTiO}_2 + \text{Al}^{3+}$ |
|-------|----------------------------------------------------------|---------------------------------------------------------------------------|
| C 1s  | 284.8                                                    | 284.8                                                                     |
| O 1s  | 529.8                                                    | 529.8                                                                     |
| N 1s  | 398.8                                                    | 398.8                                                                     |
| F 1s  | 687.8                                                    | 685.8                                                                     |
| Si 2p | 102.8                                                    | 102.8                                                                     |
| Ti 2p | 458.8                                                    | 457.8                                                                     |
| S 2p  | 164.8                                                    | 164.8                                                                     |
| Eu 3d | 1138.4                                                   | -----                                                                     |
| Al 2p | -----                                                    | 74.8                                                                      |



**Table S5.** The mass ratio of each element in Eu(tta)<sub>3</sub>bpdc-SiO<sub>2</sub>@mTiO<sub>2</sub> and Eu(tta)<sub>3</sub>bpdc-SiO<sub>2</sub>@mTiO<sub>2</sub> + Al<sup>3+</sup>.

| Elements | Line | Weight / %                                                    |                                                                                  |
|----------|------|---------------------------------------------------------------|----------------------------------------------------------------------------------|
|          |      | Eu(tta) <sub>3</sub> bpdc-SiO <sub>2</sub> @mTiO <sub>2</sub> | Eu(tta) <sub>3</sub> bpdc-SiO <sub>2</sub> @mTiO <sub>2</sub> + Al <sup>3+</sup> |
| Si       | Kα   | 22.00                                                         | 21.35                                                                            |
| O        | Kα   | 44.79                                                         | 43.73                                                                            |
| Ti       | Kα   | 18.12                                                         | 17.10                                                                            |
| C        | Kα   | 7.16                                                          | 7.04                                                                             |
| N        | Kα   | 4.64                                                          | 4.38                                                                             |
| F        | Kα   | 0.24                                                          | 0.17                                                                             |
| Eu       | Lα   | 3.05                                                          | 0.32                                                                             |
| Al       | Lα   | ----                                                          | 5.91                                                                             |

## References

1. Sun, L.; Wang, Z.; Zhang, J.Z.; Feng, J.; Liu, J.; Zhao, Y.; Shi, L. Visible and near-infrared luminescent mesoporous titania microspheres functionalized with lanthanide complexes: microstructure and luminescence with visible excitation. *RSC Adv.* **2014**, *4*, 28481–28489.
2. Zhang, Z.; Li, H.; Li, Y.; Yu, X. Full-color emission of a Eu<sup>3+</sup>-based mesoporous hybrid material modulated by Zn<sup>2+</sup> ions: Emission color changes for Zn<sup>2+</sup> sensing via an ion exchange approach. *Dalton Trans.* **2019**, *48*, 10547–10556.
3. Li, H.; Li, Y.; Zhang, Z.; Pang, X.; Yu, X. Highly selective luminescent sensing of Cu<sup>2+</sup> in aqueous solution based on a Eu(III)-centered periodic mesoporous organosilicas hybrid. *Mater. Design* **2019**, *172*, 107712.
4. Liu, P.; Li, H.R.; Wang, Y.G.; Liu, B.Y.; Zhang, W.J.; Wang, Y.J.; Yan, W.D.; Zhang, H.J.; Schubert, U. Europium complexes immobilization on titania via chemical modification of titanium alkoxide. *J. Mater. Chem.* **2008**, *18*, 735–737.
5. Nazeeruddin, M.K.; Humphry-Baker, R.; Liska, P.; Grätzel, M. Investigation of Sensitizer Adsorption and the Influence of Protons on Current and Voltage of a Dye-Sensitized Nanocrystalline TiO<sub>2</sub> Solar Cell. *J. Phys. Chem. B* **2003**, *107*, 8981–8987.
6. Nakamoto, K. *Infrared and Raman Spectra of Inorganic and Coordination Compounds*; John Wiley and Sons: Hoboken, NJ, USA, 1978.
7. Bai, C.; Wei, F.-H.; Hu, H.-M.; Yan, L.; Wang, X.; Xue, G.-L. New highly luminescent europium (III) complex covalently bonded with titania-based host via using a terpyridine carboxylate derivative linker for fluorescence sensing. *J. Lumin.* **2020**, *227*, 117545.
8. Wei, F.; Bai, C.; Hu, H.-M.; He, S.; Wang, X.; Xue, G. Novel luminescent europium-centered hybrid material covalently grafted with organically modified titania via 2-substituted imidazophenanthroline for fluorescence sensing. *J. Rare Earth* **2021**, *39*, 666–673.
